# Supplementary material
Source: HighWire-hosted journal article supplement (https://cmaj.ca/highwire/filestream/80176/field_highwire_adjunct_files/0/202246-image-1-at.pdf)

## Appendix 1

Ovaloid hypopigmented patches on the abdomen of a 3-month-old boy with neonatal lupus.

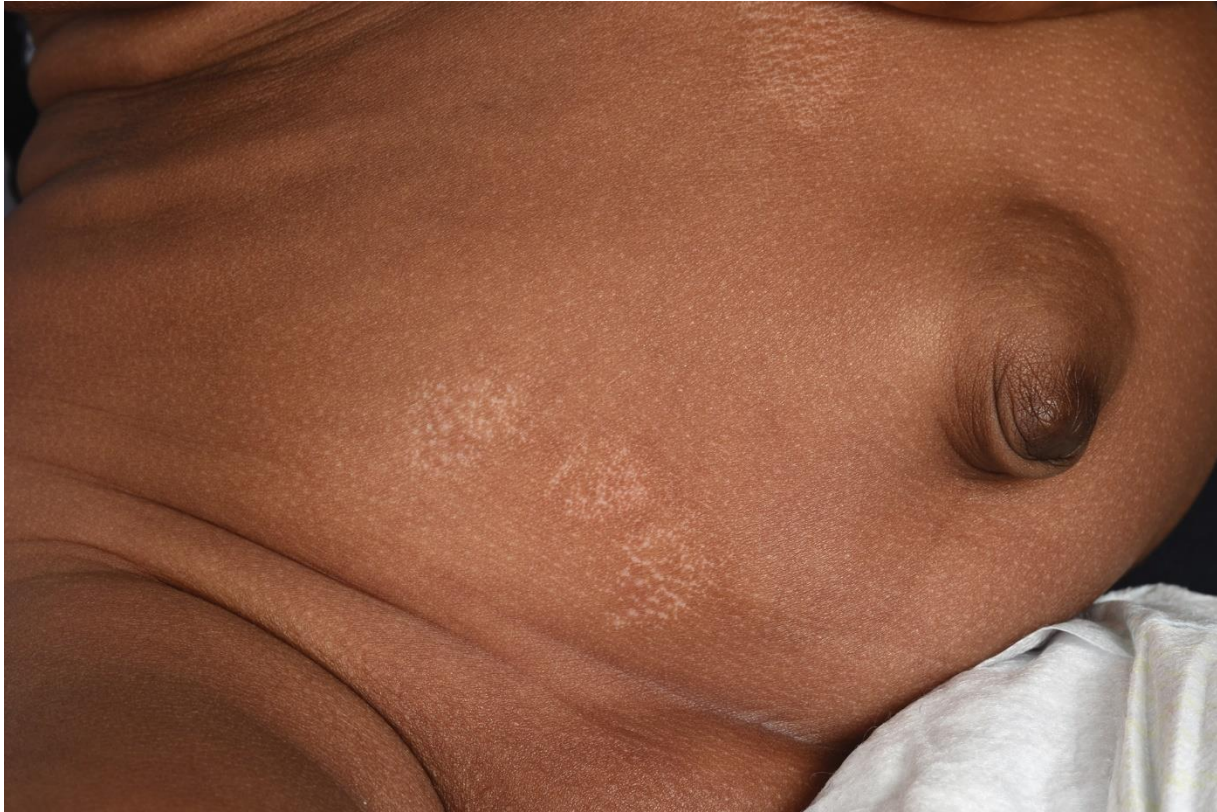

Supplement: 202246-image-1-at.pdf [file 202246-image-1-at.pdf]
